1 **Repurposing cytarabine for treating primary effusion lymphoma by targeting**  
2 **KSHV latent and lytic replications**

3

4 **Running title:** Targeting KSHV latency for treating primary effusion lymphoma

5

6 Marion Gruffaz,<sup>a</sup> Shenghua Zhou,<sup>b</sup> Karthik Vasan,<sup>a</sup> Teresa Rushing,<sup>c</sup> Qing Liu

7 Michael,<sup>b</sup> Chu Lu,<sup>d</sup> Jae U. Jung,<sup>a</sup> Shou-Jiang Gao<sup>a,e</sup>

8

9 <sup>a</sup>Department of Molecular Microbiology and Immunology, and <sup>b</sup>Eli and Edythe Broad

10 CIRM Center for Regenerative Medicine and Stem Cell Research, Keck School of

11 Medicine, University of Southern California, Los Angeles, California, USA;

12 <sup>c</sup>Children's Hospital of Los Angeles, Los Angeles, California, USA;

13 <sup>d</sup>Department of Microbiology, Nanjing Medical University, Nanjing, Jiansu, China;

14 <sup>e</sup>Laboratory of Human Virology and Oncology, Shantou University Medical College,

15 Shantou, Guangdong, China.

16

17 Address correspondence to Shou-Jiang Gao, [shoujiag@usc.edu](mailto:shoujiag@usc.edu).

18

19 \* Present address: Shenghua Zhou, Spring Bank Pharmaceuticals Inc, Milford,

20 Massachusetts, USA.

21 **Abstract**

22           Oncogenic Kaposi's sarcoma-associated herpesvirus (KSHV) is etiologically  
23 linked to primary effusion lymphoma (PEL), an aggressive and non-treatable  
24 malignancy commonly found in AIDS patients. In this study, we performed a high  
25 throughput screening of 3,731 characterized compounds, and identified cytarabine  
26 approved by FDA for treating numerous types of cancer as a potent inhibitor of  
27 KSHV-induced PEL. We showed the high efficacy of cytarabine in the growth  
28 inhibition of various PEL cells by inducing cell cycle arrest and apoptosis. Cytarabine  
29 inhibited host DNA and RNA syntheses and therefore induced cellular cytotoxicity.  
30 Furthermore, cytarabine inhibited viral DNA and RNA syntheses and induced the the  
31 rapid degradation of KSHV major latent protein LANA, leading to the suppression of  
32 KSHV latent replication. Importantly, cytarabine effectively inhibited active KSHV  
33 replication and virion production in PEL cells. Finally, cytarabine treatments not only  
34 effectively inhibited the initiation and progression of PEL tumors, but also induced  
35 regression of grown PEL tumors in a xenograft mouse model. Together, our study  
36 has identified cytarabine as novel therapeutic agent for treating PEL as well as  
37 eliminating KSHV persistent infection.

38 **Importance**

39 Primary effusion lymphoma is an aggressive malignancy caused by Kaposi's  
40 sarcoma-associated herpesvirus. The outcome of primary effusion lymphoma is  
41 dismal without specific treatment. Through a high throughput screening of  
42 characterized compounds, we identified a FDA-approved compound cytarabine as a  
43 potent inhibitor of primary effusion lymphoma. We showed that cytarabine induced  
44 regression of PEL tumors in a xenograft mouse model. Cytarabine inhibited host and  
45 viral DNA and RNA syntheses, resulting in the induction of cytotoxicity. Of interest,  
46 cytarabine induced the degradation of KSHV major latent protein LANA, hence  
47 suppressing KSHV latent replication, which is required for PEL survival. Furthermore,  
48 cytarabine inhibited KSHV lytic replication program, preventing virion production. Our  
49 findings identified cytarabine as novel therapeutic agent for treating PEL as well as  
50 for eliminating KSHV persistent infection. Since cytarabine is already approved by the  
51 FDA, it might be an ideal candidate for repurposing for PEL therapy and for further  
52 evaluation in advanced clinical trials.

53

54 **Key words:**

55 KSHV; Targeting persistent infection; Inhibition of latent and lytic replication; Latency-  
56 associated nuclear antigen (LANA) degradation; Primary effusion lymphoma;  
57 Therapeutics; Cytarabine; DNA/RNA syntheses

## 58 **Introduction**

59 Kaposi's sarcoma-associated herpesvirus (KSHV) is an oncogenic  
60 gammaherpesvirus displaying a biphasic lifecycle of latent and lytic replication  
61 phases (1). Following primary infection, KSHV establishes a lifelong latent phase  
62 punctuated by reactivation into lytic replication. KSHV is associated with several  
63 malignancies including Kaposi's sarcoma (KS), primary effusion lymphoma (PEL), a  
64 subset of multicentric Castleman's disease (MCD), and KSHV-associated  
65 inflammatory cytokine syndrome (KICS) (2).

66 PEL is a B-cell neoplasm involving body cavities of pleural, pericardial and  
67 peritoneal spaces usually without extracavitary tumor masses (3). All PEL cells  
68 harbor multiple copies of KSHV genome, which are required for their survival. Up to  
69 70% of PEL cases are also associated with Epstein-Barr virus (EBV) infection (3).  
70 Most PEL cells are latently infected by KSHV but a small number of them undergoes  
71 spontaneous lytic replication. Several KSHV latent genes including LANA (ORF73),  
72 vCyclin (ORF72), vFLIP (ORF71) and a cluster of microRNAs (miRNAs) drive the  
73 proliferation and survival of PEL cells (3, 4). Numerous viral lytic genes such as vIL6  
74 (ORF-K2) also play a role in PEL growth and survival (3).

75 PEL usually occurs in HIV-infected patients, of which half have KS or a history  
76 of KS (3). PEL accounts for about 4% of non-Hodgkin's lymphomas (NHLs) in HIV  
77 patients (5, 6). Rare cases of PEL have been described in HIV-negative  
78 immunocompromized patients after solid transplantation, or elderly men living in  
79 areas with a high KSHV prevalence such as Mediterranean and Eastern European  
80 regions (7, 8).

81 The prognosis of PEL patients is usually poor with a median survival time of  
82 6.2 months (9). There is currently no efficient and specific treatment for PEL (2, 3).

83 Because of its rarity, there has been so far no large prospective clinical trial to  
84 investigate the proper therapy for PEL. Hence, finding a treatment for PEL remains a  
85 challenge. In this context, repurposing old drugs is an attractive strategy for  
86 identifying potential treatment options for PEL.

87 Here, we performed a high throughput screening (HTS) of 3,731 characterized  
88 compounds to identify inhibitors targeting KSHV-induced oncogenic addiction and  
89 malignancies. We used a model of KSHV-induced cellular transformation of rat  
90 primary mesenchymal stem cells. This model offers both parallel uninfected (MM)  
91 and transformed cells (KMM) for comparative screening (10). We identified  
92 cytarabine as a promising candidate for targeting KSHV-induced oncogenic  
93 addiction. Cytarabine is currently approved by FDA for treating acute myeloid  
94 leukemia (AML), acute lymphocytic leukemia (ALL) and NHLs (11). We demonstrated  
95 that cytarabine was effective in inducing cell cycle arrest and apoptosis in PEL cells.  
96 Furthermore, cytarabine effectively inhibited the initiation and progression of PEL,  
97 and regressed grown PEL tumors in a xenograft mouse model. Importantly,  
98 cytarabine not only did not trigger, rather it inhibited KSHV lytic replication program,  
99 preventing virion production. Mechanistically, cytarabine inhibited both cellular and  
100 viral DNA and RNA syntheses, and triggered the degradation KSHV major latency-  
101 associated nuclear antigen (LANA), hence inducing cell stress and inhibiting KSHV  
102 persistent infection.

103

## 104 **Results**

105 **Identification of inhibitors of KSHV-transformed cells.** To identify inhibitors  
106 of KSHV-transformed cells, we conducted a HTS with libraries of small molecules  
107 using MM and KMM cells (10). The libraries consist of 3,731 individual compounds,

108 including the 2,320 compounds of Spectrum collection from MicroSource Discovery  
109 System Inc. covering a wide range of biological activities and structural diversities  
110 that are suitable for HTS programs; the NIH Clinical collection consisting 781  
111 compounds previously tested in clinical trials; the EMD Millipore Kinase collection  
112 consisting of 327 well-characterized, pharmacologically active, potent protein kinase  
113 and/or phosphatase inhibitors; and the EMD Millipore StemSelect small molecule  
114 regulators collection consisting of 303 pharmacologically active compounds including  
115 extracellular domain-targeting reagents as well as cell-permeable reagents that  
116 regulate intracellular targets. We treated MM and KMM cells with 5  $\mu$ M of each  
117 compound for 48 h and counted the surviving cells following staining with DAPI. We  
118 selected 50 compounds representing 1.3% of the libraries that induced cytotoxicity in  
119 >50% of KMM cells and <10% of MM cells (Fig.1A and B). Interestingly, most of the  
120 selected compounds (54%) are anti-inflammatory, followed by antibacterial (10%),  
121 antihypertensive (10%), antioxidant (4%), antiviral (2%), antiarthritic (2%),  
122 antiangiogenesis (2%) and catecholaminegic (2%) (Fig. 1C). Among them,  
123 cytarabine, a cytidine analogue with a modified sugar moiety, *i.e.* arabinose instead  
124 of ribose, is currently used for treating leukemia and lymphomas (11), and hence is  
125 an interesting candidate that could be repurposed for KSHV-induced malignancies.

126 To confirm the inhibition efficacy of cytarabine on KSHV-transformed cells, we  
127 treated MM and KMM cells with 0, 2.5, 5 and 10  $\mu$ M of cytarabine over a period of  
128 120 h. Cytarabine preferentially inhibited the proliferation of KMM cells in a dose-  
129 dependent manner (Fig. 1D and E). Consistently, cytarabine induced cell cycle arrest  
130 in KMM but not MM cells (Fig. 1F and G). Furthermore, extended treatment with  
131 cytarabine for up to 15 days completely eliminated live KMM cells by day 9 at 10  $\mu$ M  
132 and by day 12 at both 2.5 and 5  $\mu$ M (Fig. 1I). In contrast, while cytarabine at 5 and 10

133  $\mu\text{M}$  had slight inhibitory effect on MM cells, most cells survived up to day 12;  
134 however, most of the cells detached by day 15 albeit they remained alive (Fig. 1H).

135

136 **Cytarabine inhibits the proliferation of diverse PEL lines.** We tested the  
137 inhibitory efficacy of cytarabine on different PEL lines including BCBL1, BC3, JSC1  
138 and BCP1 cells that are singly infected by KSHV, and BC1 cells that are dually  
139 infected by KSHV and EBV. As there is no appropriate control for PEL cells, we  
140 included BJAB, a KSHV- and EBV-negative Burkitt's lymphoma cell line as a  
141 reference. At 0.5, 2 and 5  $\mu\text{M}$ , cytarabine effectively inhibited the proliferation of all  
142 PEL lines tested, which manifested a greater sensitivity than BJAB cells (Fig. 2A-F).  
143 As a result, PEL lines had IC<sub>50</sub> ranging from 0.44  $\mu\text{M}$  to 1.29  $\mu\text{M}$  while BJAB cells  
144 had an IC<sub>50</sub> 2.34  $\mu\text{M}$  (Fig. 2G). Extended treatment of BCBL1 and BCP1 cells with 1  
145  $\mu\text{M}$  cytarabine for up to 15 days completely killed all cells of both lines by day 9,  
146 indicating the lack of any emerging resistance (Fig. 2H and I).

147

148 **Cytarabine induces cell cycle arrest and apoptosis in PEL cells.** To  
149 identify the mechanism of cytarabine-mediated cytotoxicity, we examined the effect of  
150 cytarabine on cell cycle. Cytarabine at 5  $\mu\text{M}$  effectively induced cell cycle arrest in  
151 BCBL1 and BC3 cells after as short as 4 h of treatment (Fig. 3A). Similar result was  
152 observed with BJAB cells. Cytarabine at 5  $\mu\text{M}$  induced apoptosis in 63% of BCBL1  
153 cells and 49% of BC3 cells following 4 h treatment (Fig. 3B). Furthermore, treatment  
154 with 5  $\mu\text{M}$  cytarabine for 24 h induced apoptosis markers including cleaved PARP1  
155 (c-PARP1) and cleaved caspase 3 (c-caspase 3) in BCBL1, BC3, BC1, JSC1 and  
156 BCP1 cells (Fig. 3C). In contrast, cytarabine did not induce any apoptosis in BJAB  
157 cells (Fig. 3B and C).

158

159 **Cytarabine inhibits PEL initiation and progression, and regresses grown**

160 **PEL.** To examine the efficacy of cytarabine for PEL treatment, we employed a  
161 xenograft mouse model. We induced PEL in Nod/Scid mice by engrafting BCBL1-Luc  
162 cells. At day 3 post-engraftment, we treated the mice with either PBS or a liposome  
163 form of cytarabine Depocyt® at 50 mg/kg every other day for 3 weeks. Mice treated  
164 with PBS started to gain weight at as early as 1 week as a result of PEL development  
165 while those treated with cytarabine maintained relatively constant weight (Fig. 4A). At  
166 week 3 post-treatment, we performed live bioluminescence imaging and detected  
167 strong signals in all mice treated with PBS (a-j in Fig. 4B and C). However, mice  
168 treated with cytarabine (k-t) had no detectable signal at this time point, indicating that  
169 cytarabine completely inhibited PEL growth.

170 Next, we examined if cytarabine could control or regress grown PEL. The mice  
171 engrafted with BCBL1-Luc cells for 3 weeks were randomly separated into two  
172 groups, and treated with PBS or Depocyt® at 50 mg/kg every other day for 4.5  
173 weeks. Mice treated with cytarabine had reduced weights (f, b, c, i, e in Fig. 4D)  
174 indicating PEL regression while those treated with PBS continued to gain weight (a,  
175 g, h, d, j in Fig. 4D) indicating continuous PEL growth. At week 5 and 5.5 post-  
176 engraftment, mice “h, d” and “a, g, j” of the PBS group, respectively, died of PEL.  
177 Bioluminescence imaging at week 5 post-engraftment showed that the remaining 3  
178 mice in the PBS group had strong luminescent signals (Fig. 4E and F). In contrast,  
179 the luminescent signals in all mice treated with cytarabine were dramatically reduced  
180 with those in mice “f, b, i” being reduced to almost undetectable levels, indicating that  
181 cytarabine effectively regressed most of the grown tumors (Fig. 4E and F). We  
182 compared the survival rates for both groups, and observed a statistically significant



183 increase in survival rate for mice treated with cytarabine compared to mice treated  
184 with PBS (100% survival rate at week 8 post-engraftment for the cytarabine group vs  
185 0% survival rate at week 6.5 for the PBS group) (Fig. 4G). These results  
186 demonstrated that cytarabine could be an effective drug for inhibiting PEL initiation  
187 and progression, and regressing grown PEL.

188

189 **Cytarabine inhibits KSHV latent replication.** Since the survival of PEL cells  
190 depends on KSHV latent infection and multiple copies of viral episome, we  
191 determined if cytarabine might induce cytotoxicity by inhibiting KSHV latent infection.  
192 Treatment of BC1 and BCBL1 cells with cytarabine for 72 h decreased the level of  
193 intracellular KSHV DNA at least by half (Fig. 5A). Simultaneously, LANA transcript  
194 was reduced at least by half (Fig. 5B). Interestingly, LANA protein, which is essential  
195 for the replication and persistence of KSHV episome, was undetectable after 24 h of  
196 cytarabine treatment (Fig. 5C). Accordingly, <1 copy of KSHV genome per cell was  
197 detected after 3 days of cytarabine treatment compared to approximately 50 and 100  
198 copies of KSHV genome per cell in the untreated BC1 and BCBL1 cells, respectively  
199 (Fig. 5D). Since cytarabine can be incorporated into RNA and DNA by competing  
200 with intracellular nucleotides (12, 13), we determined if it might directly inhibit KSHV  
201 latent replication and expression of KSHV latent genes. We pulsed BCBL1 cells with  
202 BrDu or 4sU for 4 h, and then immunoprecipitated the BrDu-labeled DNA or 4sU-  
203 labeled RNA to monitor *de novo* DNA or RNA synthesis, respectively. Whereas the  
204 amount of newly synthesized total DNA and RNA continued to increase over a period  
205 of 4 h in control cells treated with DMSO, those of cytarabine-treated cells did not  
206 increase, indicating that cytarabine inhibited the *de novo* syntheses of total DNA and  
207 RNA (Fig. 5E). By using qPCR for BrDu-labeled cellular DNA (18S and  $\beta$ -actin) and

208 KSHV DNA (LANA), we detected inhibition of both cellular and KSHV DNA syntheses  
209 at as early as 30 min following cytarabine treatment (Fig. 5F). Interestingly, inhibition  
210 of  $\beta$ -actin and KSHV DNA syntheses seemed to be more efficient than 18S DNA  
211 synthesis. Similarly, by using RT-qPCR for 4sU-labeled cellular RNA and KSHV  
212 RNA, we detected inhibition of  $\beta$ -actin and LANA RNA syntheses by cytarabine (Fig.  
213 5G). Inhibition of LANA RNA synthesis, which could be observed at as early as 15  
214 min following cytarabine treatment, seemed to be more efficient than  $\beta$ -actin RNA  
215 synthesis. Interestingly, cytarabine treatment for up to 4 h had minimal effect on 18S  
216 RNA synthesis. Taken together, these results indicated that cytarabine inhibited the  
217 syntheses of cellular and KSHV DNA and RNA, which might account for its inhibitory  
218 effect on PEL cells and KSHV latent infection.

219

220 **Cytarabine inhibits KSHV lytic replication.** Cell stress often triggers KSHV  
221 lytic replication and spread. Treatment of BCBL1 cells with cytarabine for 96 h did not  
222 increase KSHV lytic transcripts RTA, ORF59 and ORF65 (Fig. 6A), lytic proteins  
223 ORF-K8 and ORF65 (Fig. 6B), and virion production (Fig. 6C). While sodium butyrate  
224 (NaB) robustly induced KSHV lytic replication with increase of lytic transcripts RTA,  
225 ORF59 and ORF65 (Fig. 6A), lytic proteins ORF-K8 and ORF65 (Fig. 6B), and virion  
226 production (Fig. 6C), cytarabine completely inhibited this effect. These results  
227 indicated that cytarabine did not induce, rather it inhibited KSHV lytic replication.

228

## 229 **Discussion**

230 There is currently no specific and efficient therapy for PEL. The common  
231 recommendation is “CHOP” chemotherapy, which is a combination of  
232 cyclophosphamide, doxorubicin, vincristine and prednisone (6). However, the

233 outcome is dismal with a 1-year overall survival rate at 39.3% and an aggressive  
234 clinical course (9).

235 An anti-CD20 antibody has been developed for treating CD20+ B-cell NHLs.  
236 This approach can be considered for treating some rare cases of PEL expressing  
237 CD20 as it has shown some effect on MCD (14). Autologous stem cell transplantation  
238 in combination with high dose of chemotherapy is another strategy for treating PEL  
239 (15, 16). Finally, in HIV-infected PEL patients, targeting HIV infection and restoring  
240 immune functions by combined antiretroviral therapy (cART) alone has shown  
241 excellent outcomes (17). However, cART remains problematic because of potential  
242 adverse effects due to drug-drug interactions, which increase chemotherapy toxicities  
243 (18).

244 We have identified numerous “known” small molecules that inhibit the  
245 proliferation of KSHV-transformed cells but have minimal cytotoxicity to uninfected  
246 primary cells. These compounds are well characterized with most of them currently in  
247 clinical uses or trials, and hence are potential candidates for repurposing for KSHV-  
248 induced malignancies. Among them, cytarabine is effective in inducing cytotoxicity to  
249 PEL cells.

250 Cytarabine, or cytosine arabinoside, was first synthesized in 1959 and  
251 approved for clinical usages by FDA in 1969 (11). This drug has been used in  
252 therapy of several blood cancers such as AML, ALL and NHLs (11). Cytarabine is  
253 recently utilized for treating meningeal leukemias, lymphomas and recurrent  
254 embryonal brain tumors (19). Because of these multiple indications of treatment, the  
255 mechanism of action, which is mainly based on its inhibitory effect on DNA synthesis,  
256 the pharmacokinetics, and the toxicity of this compound in patients are well described  
257 (20). We have shown that cytarabine has a strong effect on PEL cells, inducing arrest

258 and death *in vitro*, and completely abrogated tumor progression and regressed grown  
259 tumors in a PEL mouse model. These results indicate that cytarabine might be an  
260 ideal candidate for repurposing for PEL therapy.

261 Numerous studies have recently demonstrated that targeting pathways  
262 involved in differentiation and survival is a promising strategy for treating PEL.  
263 Activation of p53 with Nutlin-3 disrupted p53-MDM2 interaction and induced  
264 apoptosis of PEL cells and inhibits PEL progression (21). Silencing BLIM-1, a  
265 transcription factor involved in B-cell differentiation, led to PEL cell death (22).  
266 Triptolide inhibited cell proliferation and PEL progression by suppressing STAT3  
267 activity, IL6 secretion and LANA expression (23). Chloroquine, an inhibitor of  
268 autophagy, induced a caspase-dependent apoptosis (24). Finally, thymidine  
269 analogue azidothymidine treatment (AZT), sensitized PEL cells to Fas-ligand and  
270 TRAIL-mediated apoptosis, and might be sufficient to restore T cell control *via* KSHV-  
271 specific T CD4+ response (25).

272 We have demonstrated that cytarabine induces cell cycle arrest and apoptosis  
273 in PEL cells by inhibiting DNA and RNA syntheses. Cytarabine can theoretically be  
274 incorporated into the DNA of any proliferating cells to induce DNA damage (12). It  
275 can also be incorporated into RNA to inhibit its polymerization, and therefore has an  
276 inhibitory effect on resting cells as well (13). In cells, cytarabine competes with the  
277 endogenous cytidine during nucleic acid synthesis after conversion into its  
278 triphosphate. Because the arabinose sugar of cytarabine sterically hinders the  
279 rotation of the molecule in DNA, it inhibits DNA replication. We have shown that  
280 cytarabine induces cell cycle arrest but not cell death in BJAB, an immortalized  
281 proliferating Burkitt's lymphoma B cell line. This effect could be due to the  
282 incorporation of cytarabine into cellular DNA during S phase, resulting in the

283 cytotoxicity on “normal” proliferating cells. However, in PEL cells, we have observed  
284 that cytarabine induces both cell cycle arrest and apoptosis, indicating alternative  
285 mechanism might be involved in its cytotoxic effect. Indeed, PEL cells are universally  
286 associated with KSHV infection and highly depend on KSHV latent proteins (3). We  
287 have shown that, in addition to cellular DNA and RNA, cytarabine inhibits KSHV DNA  
288 and RNA, resulting in the inhibition of replication of KSHV latent genome. This might  
289 explain the higher sensitivity of PEL cells to cytarabine than BJAB cells.

290 Nucleoside analogs are known to have efficient inhibitory effect on herpesviral  
291 persistent infections. By impairing the interaction between HSV-1 DNA and the  
292 cellular nucleosomes, cytarabine can inhibit HSV-1 replication (26). However, HBV is  
293 resistant to this drug but sensitive to its close relative adenosine analogue Ara-A (27).  
294 The chemically close fluoro-iodo-cytosine analogue FIAC is efficient against HSV-1,  
295 HSV-2 and EBV (28, 29). Because of its anti-tumor and anti-viral effects, it would be  
296 interesting to test if cytarabine is effective against cancers associated with other  
297 oncogenic viruses.

298 KSHV latently infected cells constitute a viral reservoir in the host. Upon  
299 stimulation by stress, inflammatory cytokines, calcium ionophores, phorbol ester or  
300 histone deacetylase inhibitors (Trichostatine A and NaB), KSHV can be reactivated  
301 from latency, expressing cascades of lytic genes and producing progeny virions (30-  
302 32). KSHV lytic replication in a small number of cells is essential for the spread and  
303 progression of early stage of KS (33). Numerous chemotherapies can induce  
304 reactivation of HSV-1 and EBV from latency, raising the concerns on these  
305 therapeutic approaches (34, 35). Our results show that cytarabine not only does not  
306 induce KSHV reactivation but also robustly inhibits the viral lytic program induced by  
307 NaB. In addition to KSHV, over 70% of PEL cases are co-infected by EBV, which

308 itself is associated with several cancers (36). Similar to KSHV, EBV lytic replication  
309 participates in the spreading and pathogenesis of EBV-associated malignancies (37).  
310 Since cytarabine does not reactivate EBV from latency, it can be used for PEL  
311 treatment independent of the EBV status (38). Compared to other chemotherapies,  
312 the advantage of using cytarabine in PEL treatment is its multiple cellular and viral  
313 effects without increasing the spread of KSHV and tumor cells.

314 Taken together, we have identified cytarabine as an excellent candidate for  
315 reposition for treating PEL patients. It displays a strong inhibitory effect on PEL  
316 through multiple mechanisms. Since cytarabine is currently in clinical use and  
317 approved for treating other blood malignancies, it would be interesting to carry out  
318 advanced clinical trials to evaluate its usage and identify the optimal doses for  
319 treating PEL.

320

## 321 **Materials and Methods**

322 **Cells culture.** Rat primary embryonic mesenchymal stem cells (MM) and  
323 KSHV-transformed MM cells (KMM) were maintained in DMEM supplemented with  
324 10% fetal bovine serum (FBS, Sigma-Aldrich), 4 mM L-glutamine, and 10 µg/ml  
325 penicillin and streptomycin (10). BJAB and PEL cell lines (JSC1, BCBL1, BC3, BC1  
326 and BCP1) were maintained in RPMI-1640 supplemented with 20% FBS and  
327 antibiotics (39).

328

329 **High throughput screening.** MM and KMM cells were seeded in 96 well  
330 plates at 5,000 cells/well for 16 h and then treated with small molecules at 5 µM final  
331 concentrations in 0.1% DMSO for 48 h. Cells treated with 0.1% DMSO and Bay11  
332 were used as a negative control and a positive control, respectively. Cells were

333 washed 2 times with 1X PBS and fixed with 4% paraformaldehyde for 15 min at room  
334 temperature prior to DAPI staining. Live cells were automatically counted with the  
335 Cellomics ArrayScan VTI HCS Reader (Thermo scientific) and the results were  
336 analyzed with the HCS Studio Cell Analysis Software (Thermo scientific). Number of  
337 live cells in DMSO control was set as 100% and used to normalize cells treated with  
338 different compounds. A total of 73 hits that gave at least 50% of cytotoxicity to KMM  
339 cells but less than 10% of cytotoxicity to MM cells were selected from the first round  
340 of screening, and then validated in a secondary screening, resulting in the selection  
341 of 50 final compounds. Secondary screening was carried out on ImageXpress Micro  
342 System (Molecular Devices) and the survival cells were automatically quantified  
343 using MetaXpress software (Molecular Devices). Compounds that showed effects  
344 similar to those of the first round screening with less than 20% variations were  
345 selected.

346

347 **Cell proliferation assay.** MM, KMM and PEL cells plated at a density of  
348 200,000 cells/well and treated by different reagents including DMSO, cytarabine or  
349 sodium butyrate (NaB) were counted daily using Malassez chamber.

350

351 **Cell cycle assay.** Cell cycle was analyzed as previously described (39). PEL  
352 cells pulsed with 10  $\mu$ M 5-bromo-2'-deoxyuridine (BrdU) (B5002, Sigma-Aldrich) were  
353 stained with propidium iodide (P4864, Sigma-Aldrich). BrdU was detected with a  
354 Pacific Blue-conjugated anti-BrdU antibody (B35129, Thermo Fisher Scientific).

355

356           **Apoptosis assay.** Detection of apoptotic cells were carried out by staining the  
357 cells with DAPI and PE-Cyanine 7 conjugated anti-Annexin V antibody (25-8103-74,  
358 eBioscience) as previously described (39).

359  
360           **Western blot.** Western blotting was carried out as previously described (39).  
361 Primary antibodies to LANA (Abcam, Cambridge, MA); cleaved-PARP1 (CST);  
362 cleaved-caspase3 (CST); K8 (Santa Cruz); p53 (CST) and phospho-p53 (CST) were  
363 used. A monoclonal antibody to ORF65 was previously described (40).

364  
365           **DNA extraction and qPCR.** DNA extraction and quantitative real-time PCR  
366 (qPCR) were carried out as previously described using specific primers for  $\beta$ -actin  
367 (5'-TCCCTGGAGAAGAGGTAC-3'; 5'-AGCACTGTGTTGGCGTACAG-3'), 18S (5'-  
368 CAGCTTCCCAGAAACCAAAG-3'; ACCACCCATGGAATCAAGAA-3') and LANA (5'-  
369 CCAGGAAGTCCCACAGTGTT-3'; AGACACAGGATGGGATGGAG-3') (41). Relative  
370 gene expression levels were calculated using the  $2^{-\Delta\Delta Ct}$  formula and 18S as a  
371 loading control.

372  
373           **RNA extraction and RT-qPCR.** RNA extraction and reverse transcription  
374 qPCR (RT-qPCR) were carried out as previously described using specific primers for  
375  $\beta$ -actin, 18S, LANA, RTA (5'-CACAAAATGGCGCAAGATGA-3'; 5'-  
376 TGGTAGAGTTGGGCCTTCAGTT-3'), ORF59 (5'-CGAGTCTTCGCAAAGGTTTC-3';  
377 5'-AAGGGACCAACTGGTGTGAG-3) and ORF65 (5'-ATATGTCGCAGGCCGAATA-  
378 3'; CCACCCATCCTCCTCAGATA-3') (41).

379



380           **De novo RNA synthesis.** RNA was extracted from cells labeled with 500  $\mu$ M  
381 of 4-thiouridine (4sU) (T4509, Sigma-Aldrich) for the indicated times in the presence  
382 of DMSO or 5  $\mu$ M cytarabine in complete medium. RNA at 20  $\mu$ g was biotinylated  
383 with 0.2 mg/ml of EZ-Link HPDP-Biotin (21341, Thermo Fisher Scientific) for 2 h at  
384 room temperature, and then subjected to phenol/chloroform extraction and  
385 isopropanol precipitation to remove the unlabeled HPDP-Biotin. The biotinylated-RNA  
386 fraction pellet was resuspended in 100  $\mu$ l nuclease-free water and incubated with an  
387 equal volume of washed Dynabeads® MyOne™ Streptavidin C1 beads (65001,  
388 Thermo Fisher Scientific) for 30 min at room temperature. After 3 times of washing  
389 with washing buffer, the labeled RNA was eluded with 100  $\mu$ l of 100 mM DTT,  
390 extracted by phenol/chloroform and precipitated with isopropanol. The final pellet was  
391 resuspended in 10  $\mu$ l of nuclease-free water. cDNA was synthesized using 50 ng of  
392 RNA and specific primers of  $\beta$ -actin, 18S and LANA.

393

394           **De novo DNA synthesis.** DNA was extracted from cells labeled with 10  $\mu$ M  
395 BrdU (B5002, Sigma-Aldrich) for the indicated times in the presence of DMSO or 5  
396  $\mu$ M cytarabine in complete medium. DNA at 1  $\mu$ g was resuspended in 100  $\mu$ l  
397 nuclease-free water and fragmented with the DPNII restriction enzyme for 90 min at  
398 37°C. Digested DNA was denatured at 99°C for 10 min, cooled instantly in ice for 5  
399 min and incubated with 5  $\mu$ g of a biotinylated anti-BrdU antibody (ab2284, Abcam) in  
400 100  $\mu$ l of RIPA buffer at 4°C for 16 h. The Biotinylated-DNA was extracted with  
401 phenol/chloroform and precipitated with isopropanol. The biotinylated-DNA pellet was  
402 resuspended in 50  $\mu$ l nuclease-free water and mixed with an equal volume of  
403 Dynabeads® MyOne™ Streptavidin C1 beads (65001, Thermo Fisher Scientific) in  
404 50  $\mu$ l of RIPA buffer for 2 h at 4°C. After 3 washes with washing buffer, the labeled

405 DNA was eluded by boiling for 10 min in 100  $\mu$ l 0.1% SDS solution. The DNA was  
406 extracted with phenol/chloroform, precipitated with isopropanol, and resuspended in  
407 10  $\mu$ l of nuclease-free water. The DNA was examined by qPCR with specific primers  
408 for  $\beta$ -actin, 18S and LANA.

409

410 **Animal experiment.** For tumor initiation experiment, 20 female Nod/Scid mice  
411 at 5 weeks old were each intraperitoneally injected with  $10^7$  BCBL1 cells expressing  
412 luciferase (BCBL1-Luc). At day 3 post-inoculation, mice were treated with PBS or a  
413 liposome form of cytarabine (Depocyt®) at 50 mg/kg every other day for 3 weeks and  
414 scaled for weight twice a week. At week 3 post-inoculation, mice were injected with  
415 Luciferin at 50 mg/kg and imaged with an IVIS Spectrum In Vivo Imaging System  
416 (Perkin Elmer). The signals were analyzed with the Living Image Software (Perkin  
417 Elmer) and expressed in ROI based on the  $[p/s]/[\mu W/cm^2]$  formula.

418 For tumor regression experiment, 10 Nod/Scid mice each engrafted for 3  
419 weeks with  $10^7$  BCBL1-Luc cells were randomly split into 2 groups. One group  
420 treated with PBS and the other group treated with Depocyt® at 50 mg/kg every other  
421 day for 4.5 weeks were scaled for weight twice a week. At week 5 post-inoculation  
422 (*i.e.* week 2 post-treatment), live imaging was performed.

423 The protocols for the animal experiments were approved by the University of  
424 Southern California Institutional Animal Care and Use Committee under the protocol  
425 number #11722.

426

427 **Statistical analysis.** Statistical analysis was performed using two-tailed t-test  
428 and P-value  $P \leq 0.05$  was considered significant. Statistical symbols “\*”, “\*\*” and “\*\*\*”  
429 represent P-values  $P \leq 0.05$ ,  $\leq 0.01$  and  $\leq 0.001$ , respectively, while “NS” indicates “not

430 significant". For survival study, Kaplan-Meier survival analysis was performed and  
431 statistical significance was calculated using the log-rank test.

432

### 433 **Acknowledgments**

434 We thank members of Dr. Gao's laboratory for technical assistances and  
435 helpful discussions. This work was in part supported by grants from NIH (CA096512,  
436 CA124332, CA132637, CA177377, CA213275, DE025465 and CA197153), and a  
437 grant from the University of Southern California Norris Comprehensive Cancer  
438 Center and The Choi Family Therapeutic Screening Facility to S-J Gao, and grants  
439 from NIH (CA082057, HL110609, DE023926, AI073099, AI116585) to J U Jung.

440

### 441 **References**

- 442 1. Ye F, Lei X, and Gao SJ. 2011. Mechanisms of Kaposi's sarcoma-associated  
443 herpesvirus latency and reactivation. *Adv Virol* 2011.
- 444 2. Goncalves PH, Uldrick TS, and Yarchoan R. 2017. HIV-associated Kaposi  
445 sarcoma and related diseases. *AIDS* 31:1903-1916.
- 446 3. Cesarman E. 2011. Gammaherpesvirus and lymphoproliferative disorders in  
447 immunocompromised patients. *Cancer Lett* 305:163-174.
- 448 4. Zhu Y, Haecker I, Yang Y, Gao SJ, and Renne R. 2013. gamma-Herpesvirus-  
449 encoded miRNAs and their roles in viral biology and pathogenesis. *Curr Opin*  
450 *Virol* 3:266-275.
- 451 5. Ota Y, Hishima T, Mochizuki M, Kodama Y, Moritani S, Oyaizu N, Mine S,  
452 Ajisawa A, Tanuma J, Uehira T, Hagiwara S, Yajima K, Koizumi Y, Shirasaka T,  
453 Kojima Y, Nagai H, Yokomaku Y, Shiozawa Y, Koibuchi T, Iwamoto A, Oka S,  
454 Hasegawa H, Okada S, and Katano H. 2014. Classification of AIDS-related  
455 lymphoma cases between 1987 and 2012 in Japan based on the WHO  
456 classification of lymphomas, fourth edition. *Cancer Med* 3:143-153.
- 457 6. Simonelli C, Spina M, Cinelli R, Talamini R, Tedeschi R, Gloghini A, Vaccher E,  
458 Carbone A, and Tirelli U. 2003. Clinical features and outcome of primary effusion  
459 lymphoma in HIV-infected patients: a single-institution study. *J Clin Oncol*  
460 21:3948-3954.

- 461 7. Klepfish A, Sarid R, Shtalrid M, Shvidel L, Berrebi A, and Schattner A. 2001.  
462 Primary effusion lymphoma (PEL) in HIV-negative patients--a distinct clinical  
463 entity. *Leuk Lymphoma* 41:439-443.
- 464 8. Jones D, Ballestas ME, Kaye KM, Gulizia JM, Winters GL, Fletcher J, Scadden  
465 DT, and Aster JC. 1998. Primary-effusion lymphoma and Kaposi's sarcoma in a  
466 cardiac-transplant recipient. *N Engl J Med* 339:444-449.
- 467 9. Boulanger E, Gerard L, Gabarre J, Molina JM, Rapp C, Abino JF, Cadranel J,  
468 Chevret S, and Oksenhendler E. 2005. Prognostic factors and outcome of  
469 human herpesvirus 8-associated primary effusion lymphoma in patients with  
470 AIDS. *J Clin Oncol* 23:4372-4380.
- 471 10. Jones T, Ye F, Bedolla R, Huang Y, Meng J, Qian L, Pan H, Zhou F, Moody R,  
472 Wagner B, Arar M, and Gao SJ. 2012. Direct and efficient cellular transformation  
473 of primary rat mesenchymal precursor cells by KSHV. *J Clin Invest* 122:1076-  
474 1081.
- 475 11. Reese ND, and Schiller GJ. 2013. High-dose cytarabine (HD araC) in the  
476 treatment of leukemias: a review. *Curr Hematol Malig Rep* 8:141-148.
- 477 12. Prakasha Gowda AS, Polizzi JM, Eckert KA, and Spratt TE. 2010. Incorporation  
478 of gemcitabine and cytarabine into DNA by DNA polymerase beta and ligase  
479 III/XRCC1. *Biochemistry* 49:4833-4840.
- 480 13. de Vries JF, Falkenburg JH, Willemze R, and Barge RM. 2006. The mechanisms  
481 of Ara-C-induced apoptosis of resting B-chronic lymphocytic leukemia cells.  
482 *Haematologica* 91:912-919.
- 483 14. Lim ST, Rubin N, Said J, and Levine AM. 2005. Primary effusion lymphoma:  
484 successful treatment with highly active antiretroviral therapy and rituximab. *Ann*  
485 *Hematol* 84:551-552.
- 486 15. Won JH, Han SH, Bae SB, Kim CK, Lee NS, Lee KT, Park SK, Hong DS, Lee  
487 DW, and Park HS. 2006. Successful eradication of relapsed primary effusion  
488 lymphoma with high-dose chemotherapy and autologous stem cell  
489 transplantation in a patient seronegative for human immunodeficiency virus. *Int J*  
490 *Hematol* 83:328-330.
- 491 16. Bryant A, and Milliken S. 2008. Successful reduced-intensity conditioning  
492 allogeneic HSCT for HIV-related primary effusion lymphoma. *Biol Blood Marrow*  
493 *Transplant* 14:601-602.
- 494 17. Oksenhendler E, Clauvel JP, Jouveshomme S, Davi F, and Mansour G. 1998.  
495 Complete remission of a primary effusion lymphoma with antiretroviral therapy.  
496 *Am J Hematol* 57:266.
- 497 18. Okada S, Goto H, and Yotsumoto M. 2014. Current status of treatment for  
498 primary effusion lymphoma. *Intractable Rare Dis Res* 3:65-74.
- 499 19. Peyrl A, Chocholous M, Kieran MW, Azizi AA, Prucker C, Czech T, Dieckmann  
500 K, Schmook MT, Haberler C, Leiss U, and Slavic I. 2012. Antiangiogenic  
501 metronomic therapy for children with recurrent embryonal brain tumors. *Pediatr*  
502 *Blood Cancer* 59:511-517.

- 503 20. Watterson J, Toogood I, Nieder M, Morse M, Friedrich S, Lee Y, Moertel CL, and  
504 Priest JR. 1994. Excessive spinal cord toxicity from intensive central nervous  
505 system-directed therapies. *Cancer* 74:3034-3041.
- 506 21. Sarek G, and Ojala PM. 2007. p53 reactivation kills KSHV lymphomas efficiently  
507 in vitro and in vivo: new hope for treating aggressive viral lymphomas. *Cell Cycle*  
508 6:2205-2209.
- 509 22. Belletti D, Tosi G, Forni F, Lagreca I, Barozzi P, Pederzoli F, Vandelli MA, Riva  
510 G, Luppi M, and Ruozzi B. 2016. PEGylated siRNA lipoplexes for silencing of  
511 BLIMP-1 in Primary Effusion Lymphoma: In vitro evidences of antitumoral  
512 activity. *Eur J Pharm Biopharm* 99:7-17.
- 513 23. Long C, Guo W, Zhou H, Wang J, Wang H, and Sun X. 2016. Triptolide  
514 decreases expression of latency-associated nuclear antigen 1 and reduces viral  
515 titers in Kaposi's sarcoma-associated and herpesvirus-related primary effusion  
516 lymphoma cells. *Int J Oncol* 48:1519-1530.
- 517 24. Masud Alam M, Kariya R, Kawaguchi A, Matsuda K, Kudo E, and Okada S.  
518 2016. Inhibition of autophagy by chloroquine induces apoptosis in primary  
519 effusion lymphoma in vitro and in vivo through induction of endoplasmic  
520 reticulum stress. *Apoptosis* 21:1191-1201.
- 521 25. Williamson SJ, Nicol SM, Sturzl M, Sabbah S, and Hislop AD. 2016.  
522 Azidothymidine sensitizes primary effusion lymphoma cells to Kaposi sarcoma-  
523 associated herpesvirus-specific CD4+ T cell control and inhibits vIRF3 function.  
524 *PLoS Pathog* 12:e1006042.
- 525 26. Sanders I, Boyer M, and Fraser NW. 2015. Early nucleosome deposition on, and  
526 replication of, HSV DNA requires cell factor PCNA. *J Neurovirol* 21:358-369.
- 527 27. Hess G, Arnold W, and Meyer zum Buschenfelde KH. 1981. Inhibition of hepatitis  
528 B virus deoxyribonucleic acid polymerase by the 5'-triphosphates of 9-beta-D-  
529 arabinofuranosyladenine and 1-beta-D-arabinofuranosylcytosine. *Antimicrob*  
530 *Agents Chemother* 19:44-50.
- 531 28. Lin JC, Smith MC, Cheng YC, and Pagano JS. 1983. Epstein-Barr virus:  
532 inhibition of replication by three new drugs. *Science* 221:578-579.
- 533 29. Schinazi RF, Fox JJ, Watanabe KA, and Nahmias AJ. 1986. Activities of 1-(2-  
534 deoxy-2-fluoro-beta-D-arabinofuranosyl)-5-iodocytosine and its metabolites  
535 against herpes simplex virus types 1 and 2 in cell culture and in mice infected  
536 intracerebrally with herpes simplex virus type 2. *Antimicrob Agents Chemother*  
537 29:77-84.
- 538 30. Chang J, Renne R, Dittmer D, and Ganem D. 2000. Inflammatory cytokines and  
539 the reactivation of Kaposi's sarcoma-associated herpesvirus lytic replication.  
540 *Virology* 266:17-25.
- 541 31. Wang SE, Wu FY, Chen H, Shamay M, Zheng Q, and Hayward GS. 2004. Early  
542 activation of the Kaposi's sarcoma-associated herpesvirus RTA, RAP, and MTA  
543 promoters by the tetradecanoyl phorbol acetate-induced AP1 pathway. *J Virol*  
544 78:4248-4267.

- 545 32. Purushothaman P, Uppal T, and Verma SC. 2015. Molecular biology of KSHV  
546 lytic reactivation. *Viruses* 7:116-153.
- 547 33. Engels EA, Biggar RJ, Marshall VA, Walters MA, Gamache CJ, Whitby D, and  
548 Goedert JJ. 2003. Detection and quantification of Kaposi's sarcoma-associated  
549 herpesvirus to predict AIDS-associated Kaposi's sarcoma. *AIDS* 17:1847-1851.
- 550 34. Djuric M, Jankovic L, Jovanovic T, Pavlica D, Brkic S, Knezevic A, Markovic D,  
551 and Milasin J. 2009. Prevalence of oral herpes simplex virus reactivation in  
552 cancer patients: a comparison of different techniques of viral detection. *J Oral*  
553 *Pathol Med* 38:167-173.
- 554 35. Feng WH, Cohen JI, Fischer S, Li L, Sneller M, Goldbach-Mansky R, Raab-  
555 Traub N, Delecluse HJ, and Kenney SC. 2004. Reactivation of latent Epstein-  
556 Barr virus by methotrexate: a potential contributor to methotrexate-associated  
557 lymphomas. *J Natl Cancer Inst* 96:1691-1702.
- 558 36. Zhang T, Fu Q, Gao D, Ge L, Sun L, and Zhai Q. 2014. EBV associated  
559 lymphomas in 2008 WHO classification. *Pathol Res Pract* 210:69-73.
- 560 37. Li H, Liu S, Hu J, Luo X, Li N, A MB, and Cao Y. 2016. Epstein-Barr virus lytic  
561 reactivation regulation and its pathogenic role in carcinogenesis. *Int J Biol Sci*  
562 12:1309-1318.
- 563 38. Lima RT, Seca H, Bras S, Nascimento MS, and Vasconcelos MH. 2011.  
564 Treatment of Akata EBV-positive cells with doxorubicin causes more EBV  
565 reactivation than treatment with etoposide. *Chemotherapy* 57:195-203.
- 566 39. He M, Tan B, Vasan K, Yuan H, Cheng F, Ramos da Silva S, Lu C, and Gao SJ.  
567 2017. SIRT1 and AMPK pathways are essential for the proliferation and survival  
568 of primary effusion lymphoma cells. *J Pathol* 242:309-321.
- 569 40. Gao SJ, Deng JH, and Zhou FC. 2003. Productive lytic replication of a  
570 recombinant Kaposi's sarcoma-associated herpesvirus in efficient primary  
571 infection of primary human endothelial cells. *J Virol* 77:9738-9749.
- 572 41. Cheng F, He M, Jung JU, Lu C, and Gao SJ. 2016. Suppression of Kaposi's  
573 sarcoma-associated herpesvirus infection and replication by 5'-AMP-activated  
574 protein kinase. *J Virol* 90:6515-6525.
- 575

576 **Figure legends**

577 **FIG 1** Identification of small molecules that induce cytotoxicity in KSHV-transformed  
578 (KMM) but not uninfected (MM) cells. (A) MM and KMM cells were treated with  
579 libraries of 3,731 compounds from the MicroSource Discovery System Spectrum  
580 collection, the NIH Clinical collection, the EMD Millipore kinases collection and the  
581 EMD Millipore StemSelect small molecule regulators collection. Cells treated with 5  
582  $\mu\text{M}$  of each compound for 48 h were washed with PBS, fixed, stained with DAPI and  
583 counted for live cells. Results normalized using DMSO as a negative control  
584 (standardized at 100% of live cells) were expressed as percentages of live cells. The  
585 blue lines represent 100% live cells. The green lines are cutoff thresholds set at 50%  
586 of live cells for KMM cells and 90% of live cell for MM cells. A total of 73 compounds  
587 (1.9% of all compounds) shown in the red square were selected from the initial  
588 screening. (B) Secondary screening to validate the 73 selected compounds resulting  
589 in the selection of 50 compounds (1.3% of all compounds). Error bars represent the  
590 pool of the results from the first screening and the secondary screening. (C) Analysis  
591 of the biological functions of the 50 validated compounds. Results are expressed in  
592 percentages. (D-E) Analysis of the effect of cytarabine on cell proliferation of MM (D)  
593 and KMM (E) cells. (F-G) Analysis of the effect of 5  $\mu\text{M}$  cytarabine on cell cycle  
594 progression of MM (F) and KMM (G) cells. (H-I) Analysis of the long-term effect of  
595 different doses of cytarabine on MM (H) and KMM (I) cells over a period of 15 days.  
596 Cytarabine was replenished every 3 days.

597

598 **FIG 2** Cytarabine inhibits cell proliferation of primary effusion lymphoma cells. (A-F)  
599 Analysis of the cell proliferation of BJAB (A), JSC1 (B), BCBL1 (C), BC3 (D), BC1 (E)  
600 and BCP1 (F) cell lines treated with DMSO or different doses of cytarabine for 120 h.

601 (G) IC<sub>50</sub> (μM) of cytarabine for each PEL cell line. (H-I) Long-term effect of  
602 cytarabine on BCBL1 (H) and BC1 (I) cells over a period of 15 days. Cytarabine was  
603 replenished every 3 days.

604

605 **FIG 3** Cytarabine induces cell cycle arrest and apoptosis of primary effusion  
606 lymphoma cells. (A) Effect of cytarabine on cell cycle progression of BJAB, BCBL1  
607 and BC3 cells. Cells treated with 5 μM cytarabine for 48 h were analyzed by flow  
608 cytometry after BrDu and PI staining. (B) Induction of apoptosis in BJAB, BCBL1 and  
609 BC3 cells by cytarabine. Cells treated with 5 μM cytarabine for 48 h were analyzed  
610 by flow cytometry after Annexin-5 and DAPI staining. Early apoptotic cells were those  
611 that were only positive for Annexin-5, late apoptotic cells were those that were only  
612 positive for DAPI, and necrotic cells were those that were positive for both Annexin-5  
613 and DAPI. (C) Analysis of apoptosis markers cleaved PARP1 (c-PARP1) and cleaved  
614 caspase 3 (c-caspase 3) in BJAB, BCBL1, BC3, BC1, JSC1 and BCP1 cells treated  
615 with 5 μM cytarabine for 0, 24 and 48 h by Western-blotting.

616

617 **FIG 4** Cytarabine inhibits tumor initiation and progression in a xenograft mouse  
618 model of primary effusion lymphoma. (A) Weights of Nod/Scid mice intraperitoneally  
619 engrafted with 10<sup>7</sup> BCBL1-Luc cells and treated 3 days later with a liposome form of  
620 Cytarabine (Depocyt®), every other days, for 3 weeks, were monitored twice a week.  
621 (B) Tumor burden of Nod/Scid mice described in (A) was analyzed by Luminescence  
622 assay at week 3 following the treatment of Depocyt®. (C) Luminescent signals from  
623 (B) were quantified and expressed in ROI (Total Radiant Efficiency [p/s]/[μW/cm<sup>2</sup>]).  
624 (D) Weights of Nod/Scid mice intraperitoneally engrafted with 10<sup>7</sup> BCBL1-Luc for 3  
625 weeks, and then treated with Depocyt®, every other days, for 4.5 weeks, were



626 monitored twice a week. (E) Tumor burden of Nod/Scid mice described in (D) was  
627 analyzed by Luminescence assay at week 4.5 following the treatment of Depocyt®.  
628 “Δ” symbol indicates mice euthanized before the Luminescence assay. (F)  
629 Luminescent signals from (E) were quantified and expressed in ROI. “Δ” symbol  
630 indicates mice euthanized before the Luminescence assay. (G) Survival analysis of  
631 Nod/Scid mice described in (D).

632

633 **FIG 5** Cytarabine inhibits KSHV latent replication in primary effusion lymphoma. (A)  
634 Analysis of KSHV intracellular DNA in BC1 and BCBL1 cells treated with cytarabine  
635 by qPCR using LANA specific primers. (B) Analysis of the expression of LANA  
636 transcript in BC1 and BCBL1 cells treated with cytarabine by RT-qPCR using LANA  
637 specific primers. (C) Analysis of LANA protein in BC1 and BCBL1 cells treated with  
638 cytarabine by Western blot using a LANA specific antibody. (D) Quantification of  
639 KSHV genome copies per cell in BC1 and BCBL1 cells by qPCR after 12 days of  
640 cytarabine treatment. (E) Inhibition of DNA synthesis in BCBL1 cells treated with  
641 DMSO or cytarabine was analyzed by BrDU incorporation and quantification of  
642 immunoprecipitated BrDU-labeled DNA by Nanodrop. Inhibition of RNA synthesis in  
643 BCBL1 cells treated with DMSO or cytarabine was analyzed by 4sU incorporation  
644 and quantification of immunoprecipitated 4sU-labelled RNA by Nanodrop. (F)  
645 Inhibition of the syntheses of 18S,  $\beta$ -actin and LANA DNA in BCBL1 cells treated with  
646 DMSO or cytarabine was analyzed by qPCR on immunoprecipitated BrDU-labeled  
647 DNA from (E) using 18S,  $\beta$ -actin and LANA specific primers respectively. Results  
648 expressed in Ct were normalized with Ct of inputs. (G) Inhibition of the syntheses of  
649 18S,  $\beta$ -actin and LANA RNAs in BCBL1 cells treated with DMSO or cytarabine was  
650 analyzed by RT-qPCR on immunoprecipitated 4sU-labelled RNA from (E) using 18S,

651  $\beta$ -actin and LANA specific primers respectively. Results expressed in Ct were  
652 normalized with Ct of inputs.

653

654 **FIG 6** Cytarabine inhibits KSHV reactivation in primary effusion lymphoma. (A)  
655 Analysis of the expression of RTA, ORF59 and ORF65 transcripts in BCBL1 cells  
656 treated with DMSO, cytarabine, NaB or cytarabine + NaB by RT-qPCR. (B) Analysis  
657 of the expression of ORF-K8 and ORF65 proteins in BCBL1 cells treated with DMSO,  
658 cytarabine, NaB or cytarabine + NaB by Western blot using anti-ORF-K8 and anti-  
659 ORF65 antibodies. (C) Analysis of viral yield in BCBL1 cells treated with DMSO,  
660 cytarabine, NaB or cytarabine + NaB by PCR in supernatants pretreated with DNase.

**Figure 1**

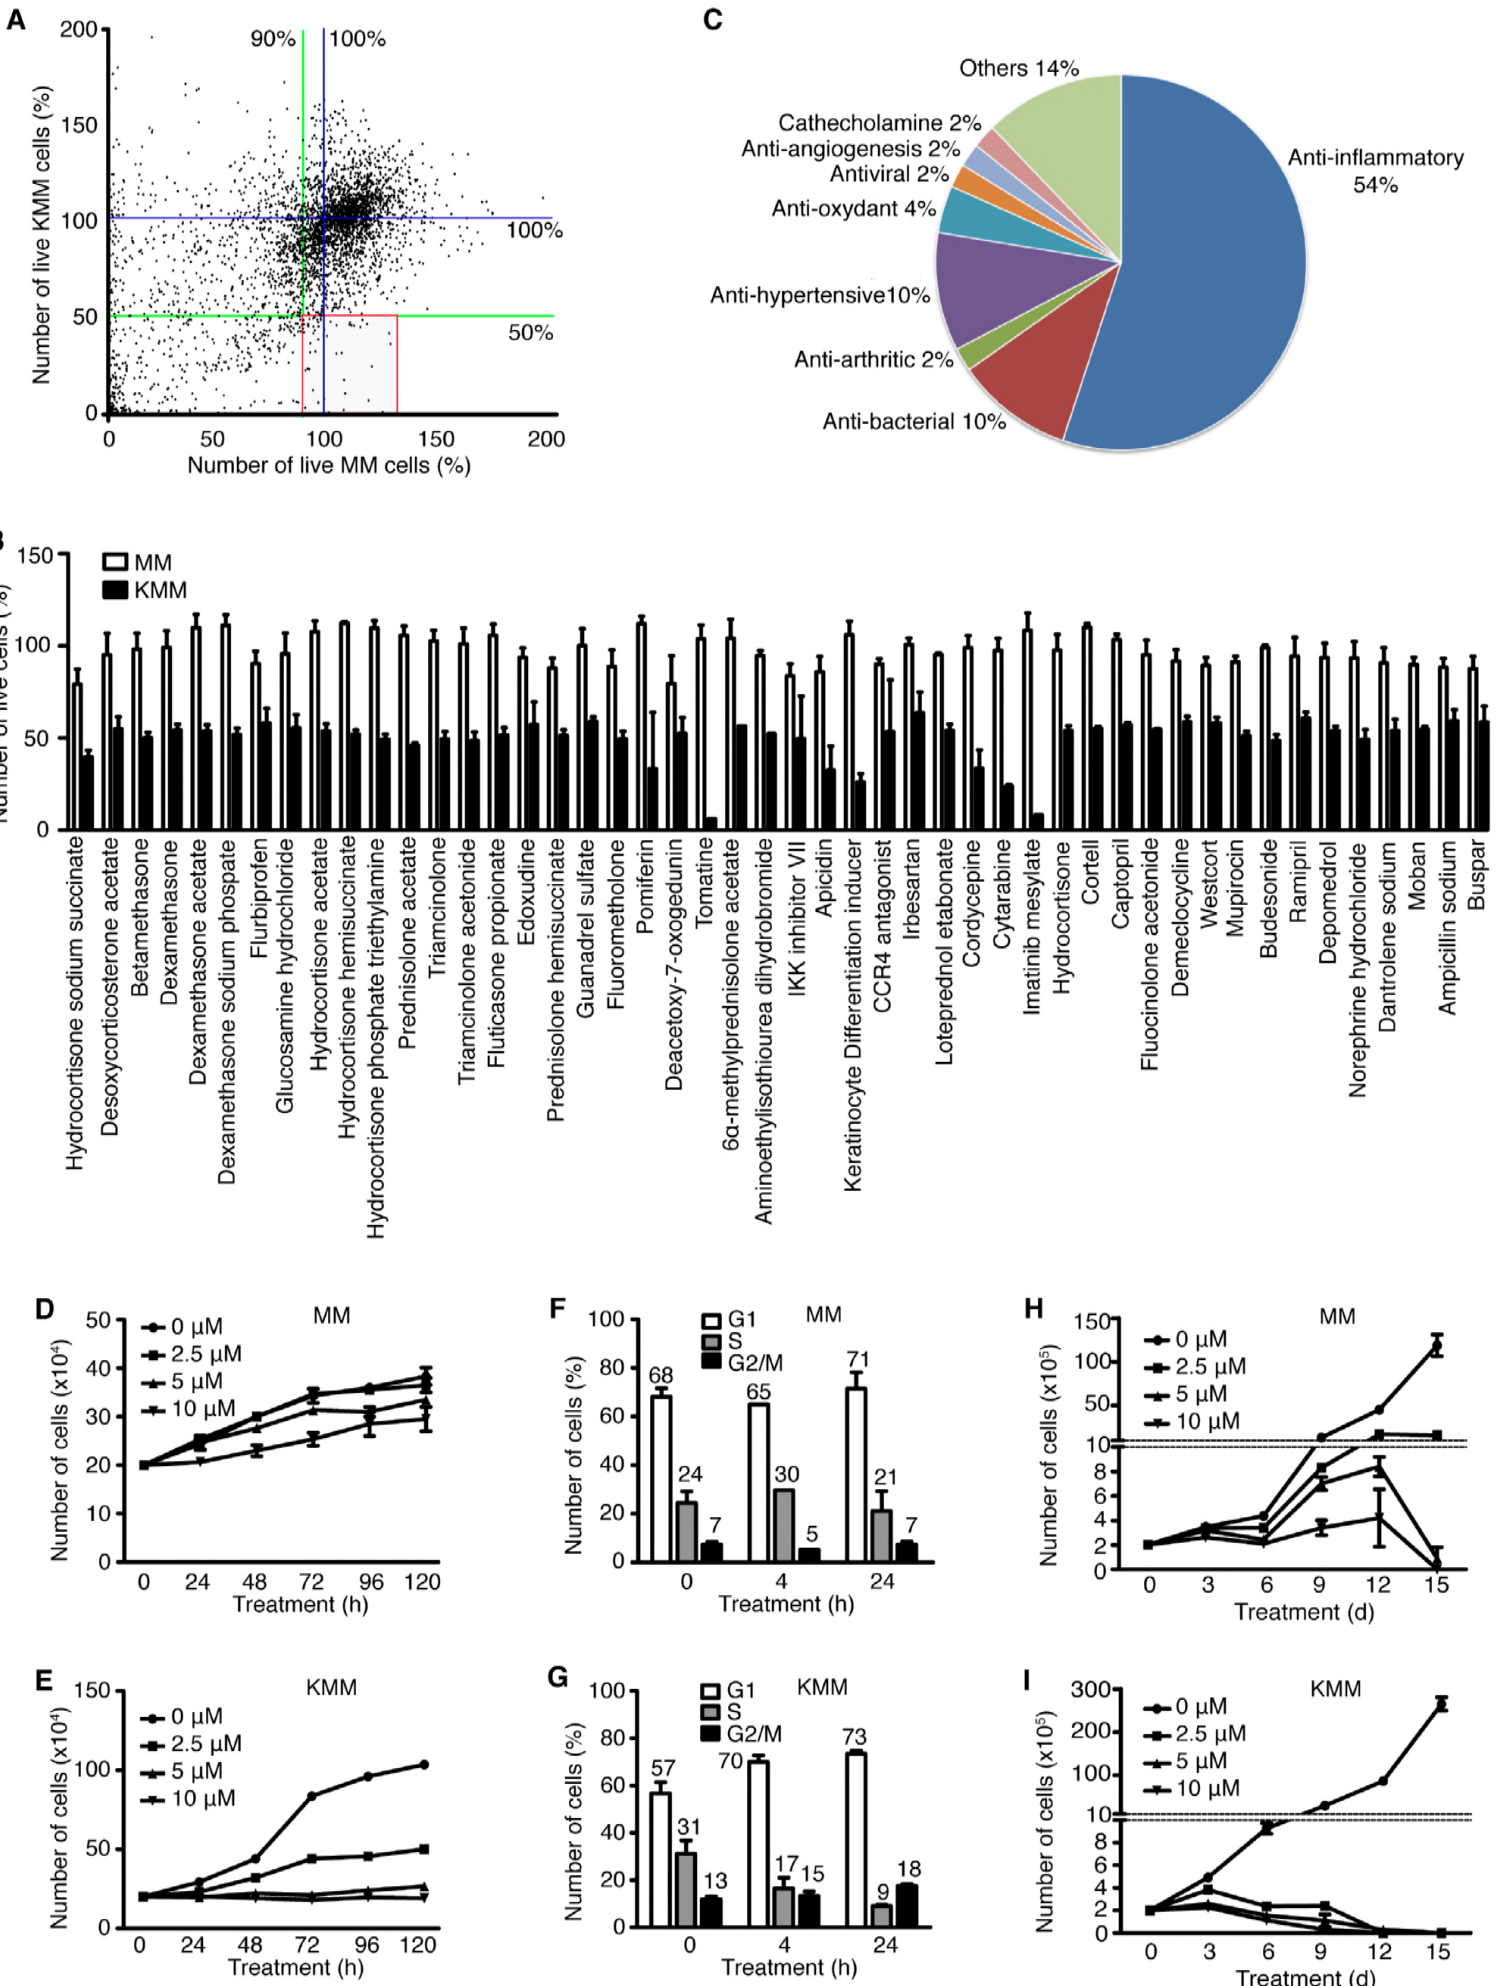

**Figure 2**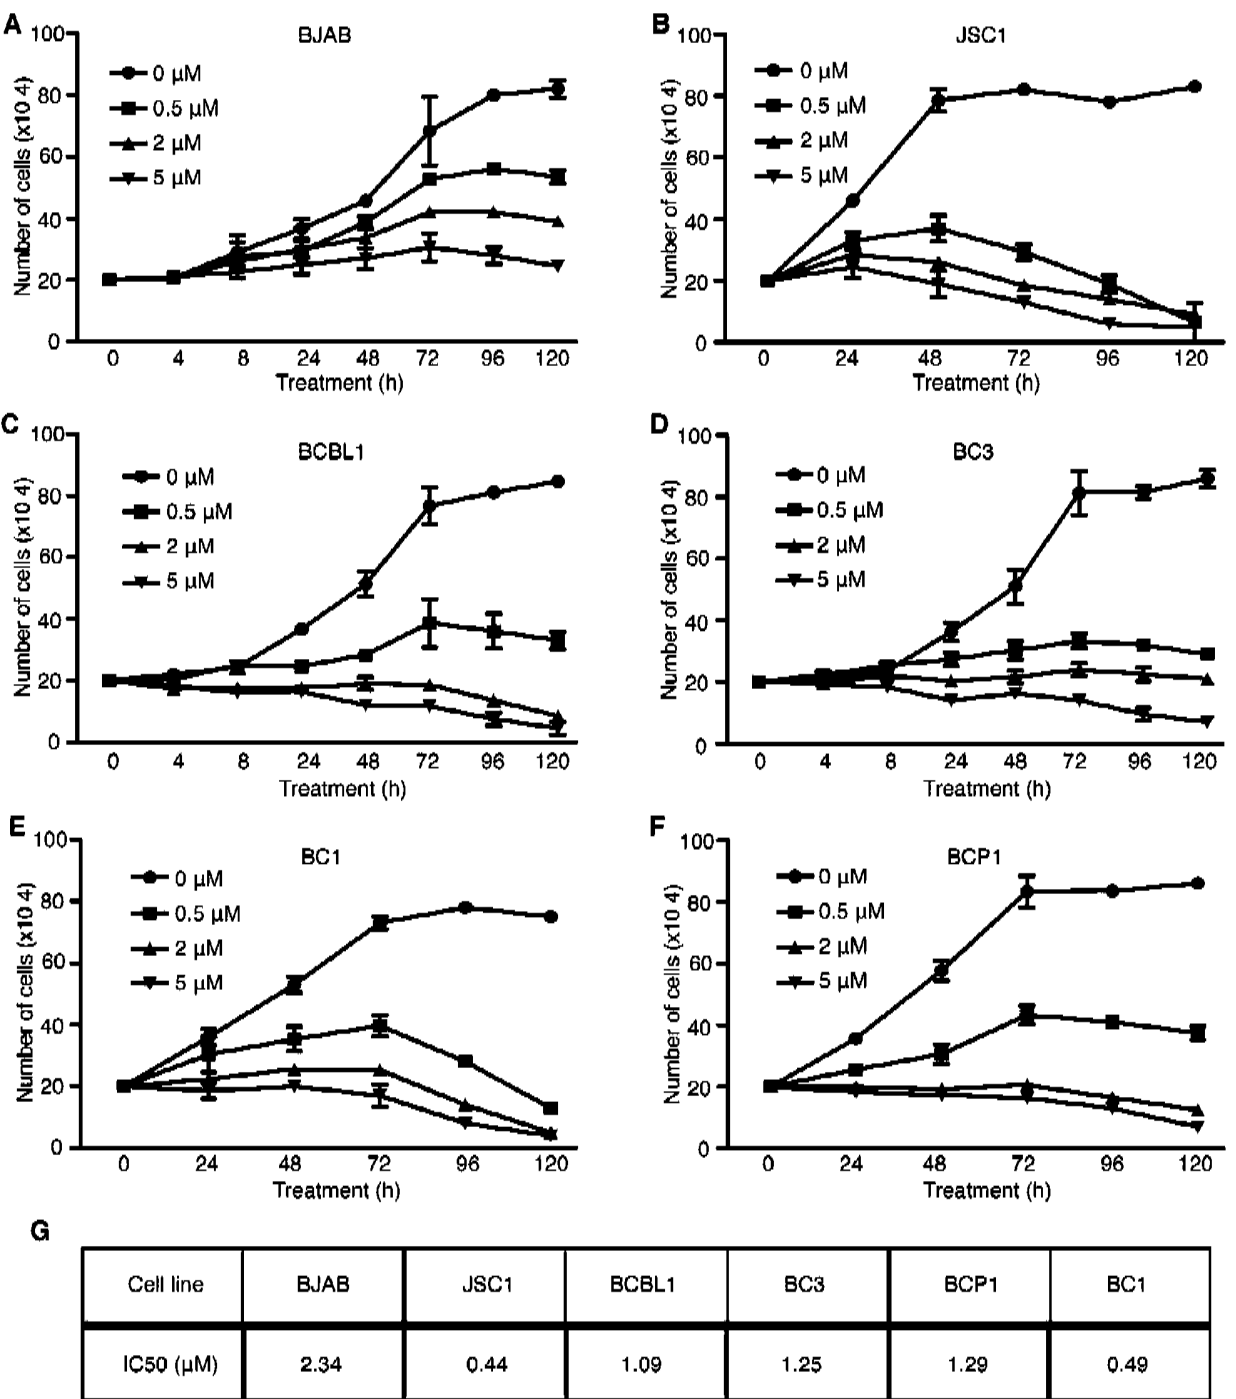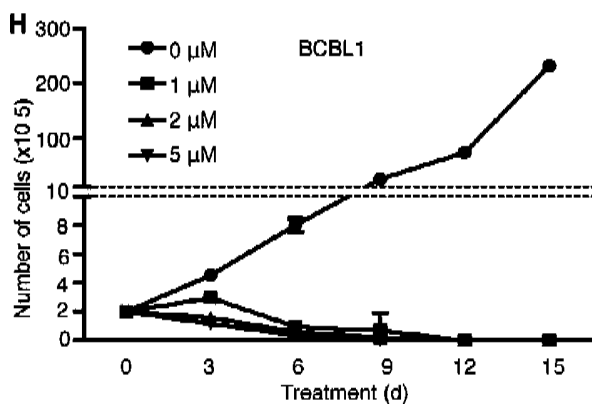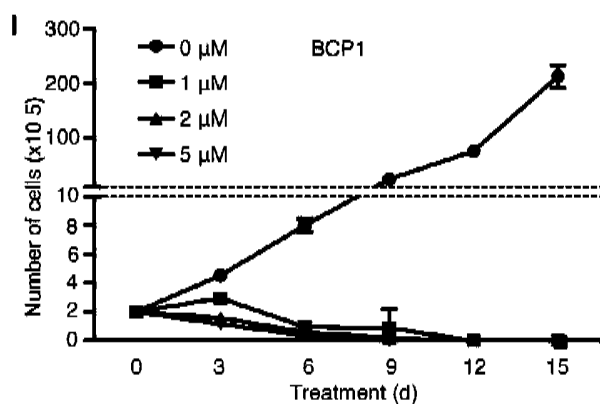

**Figure 3**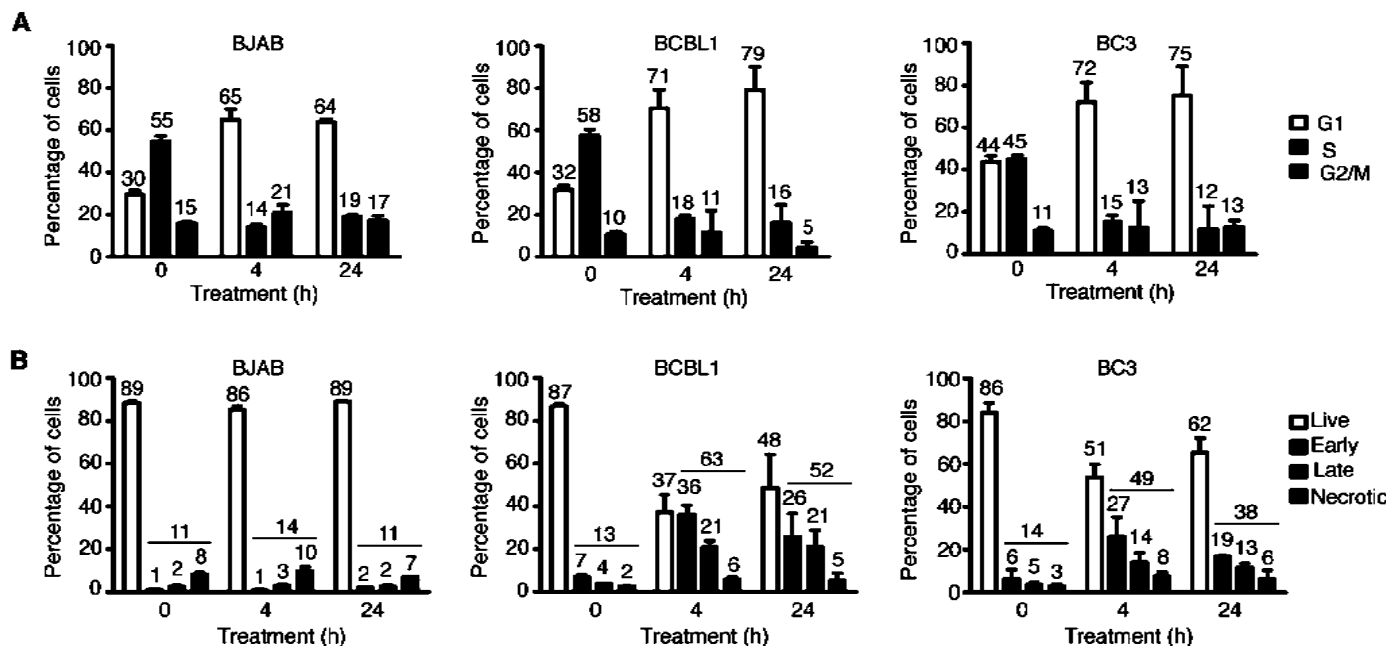**C**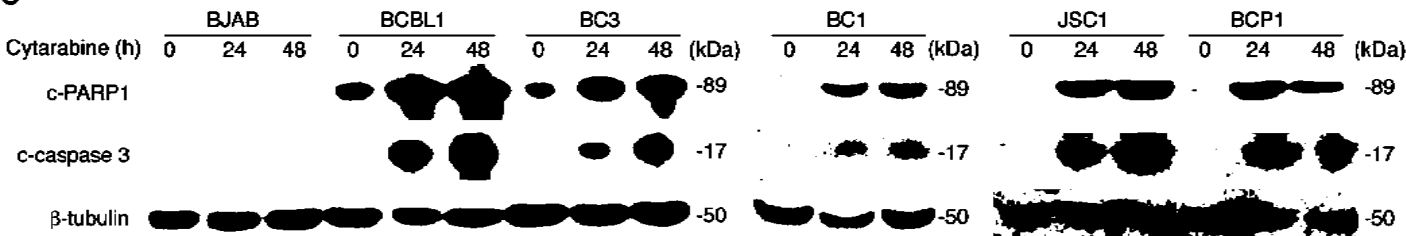

**Figure 4**

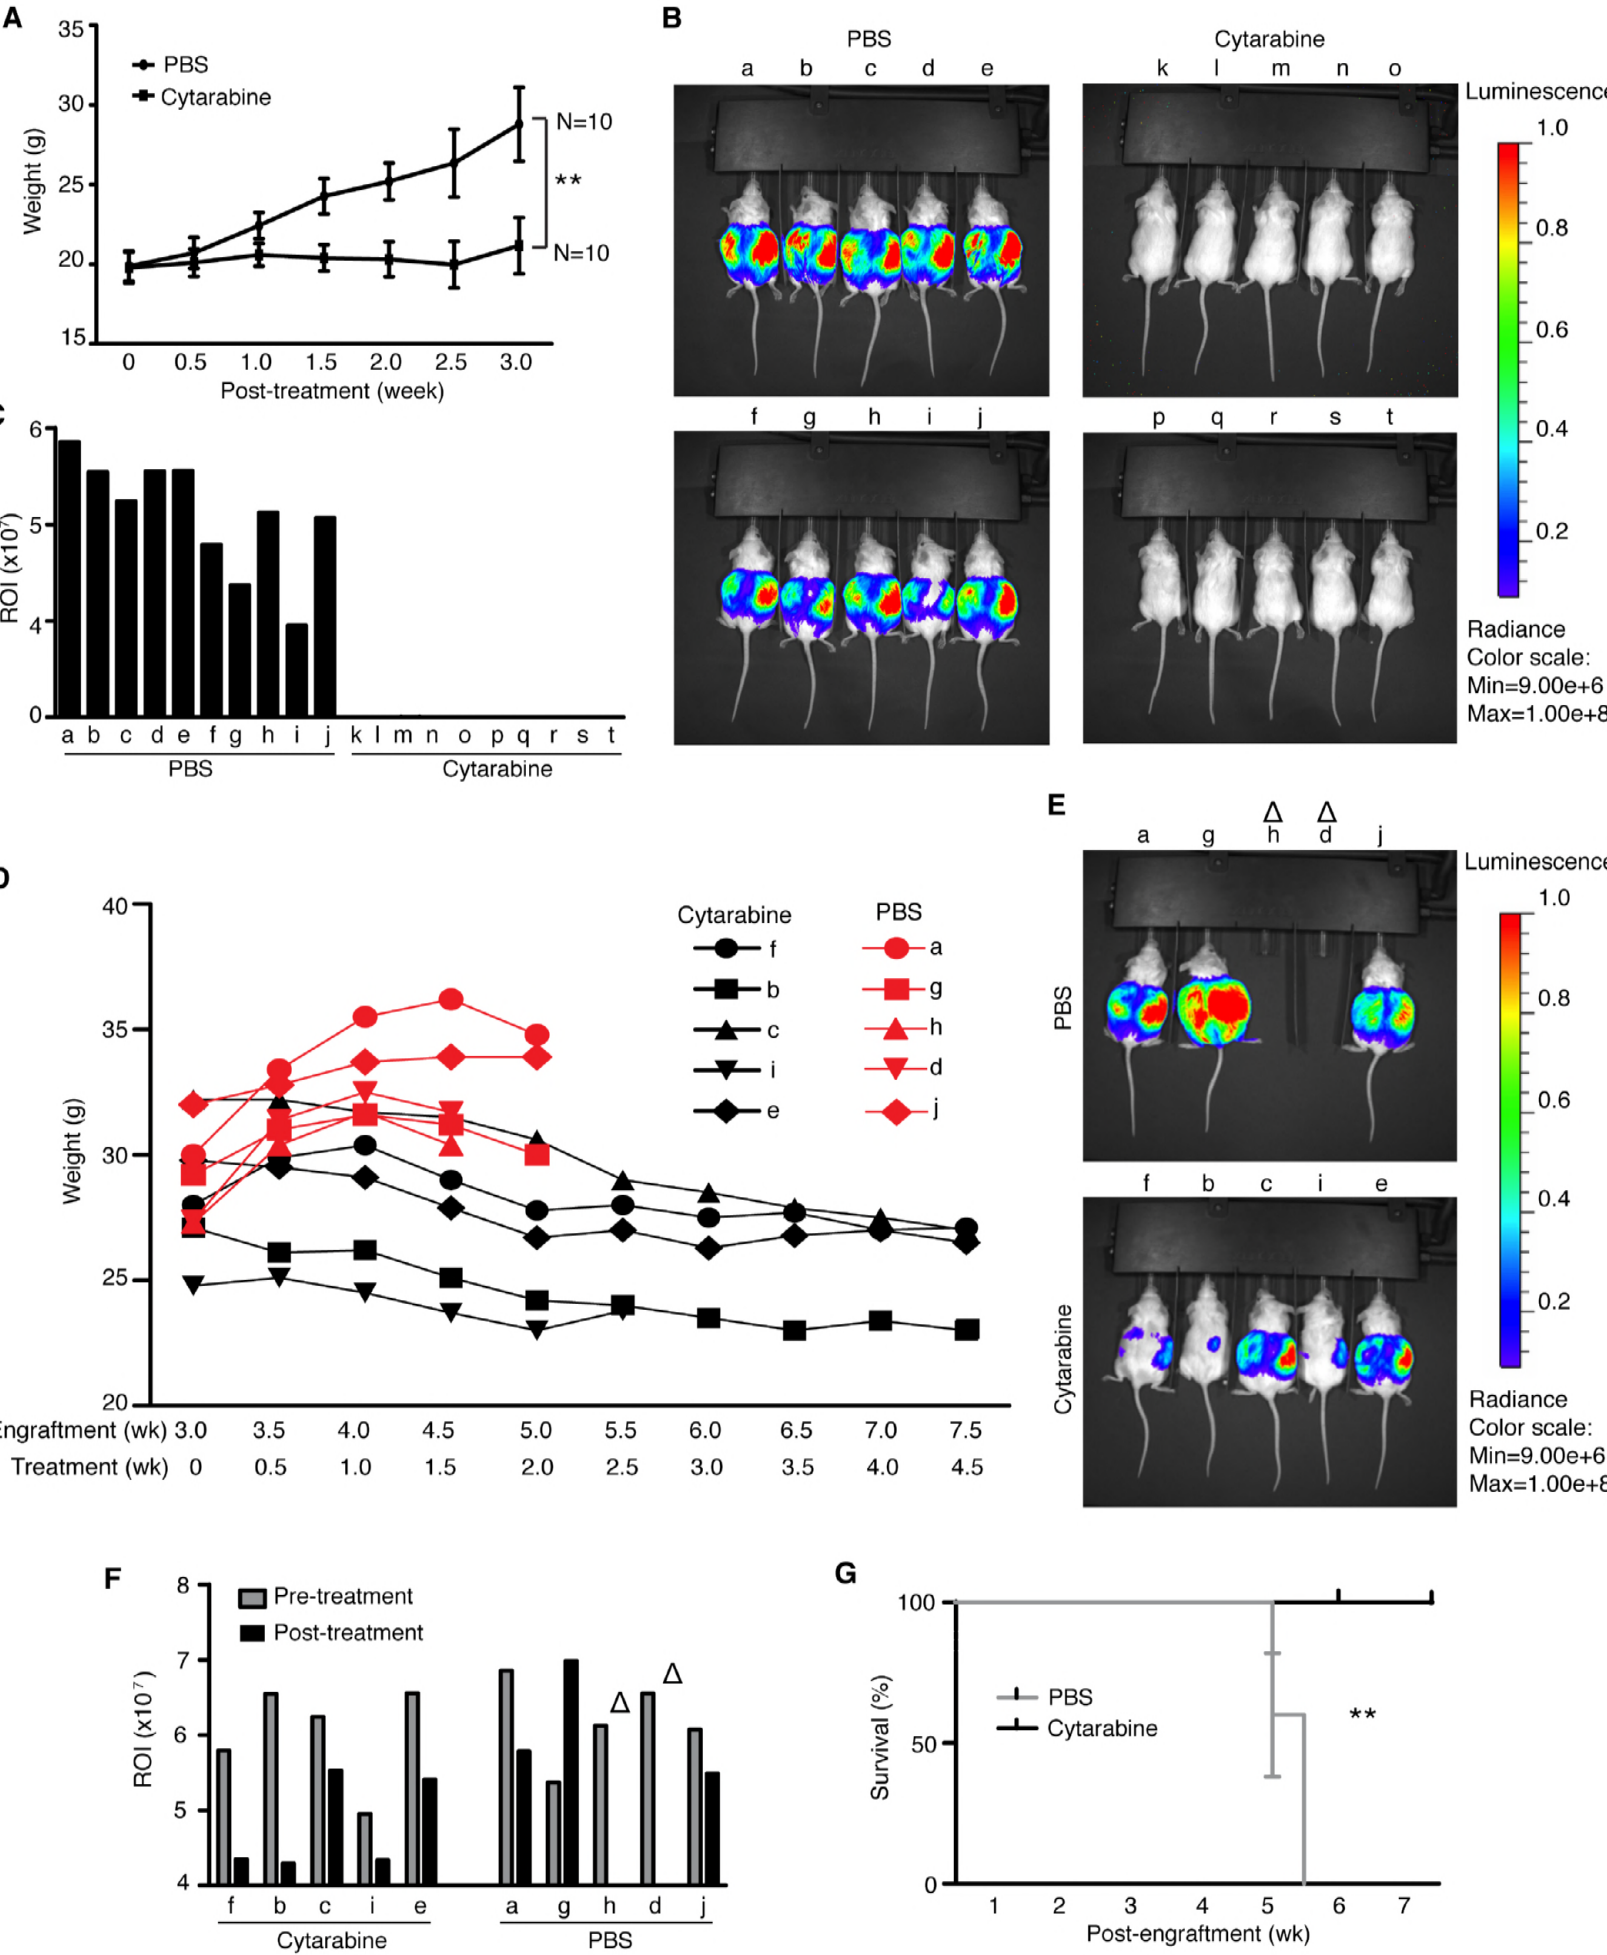

**Figure 5**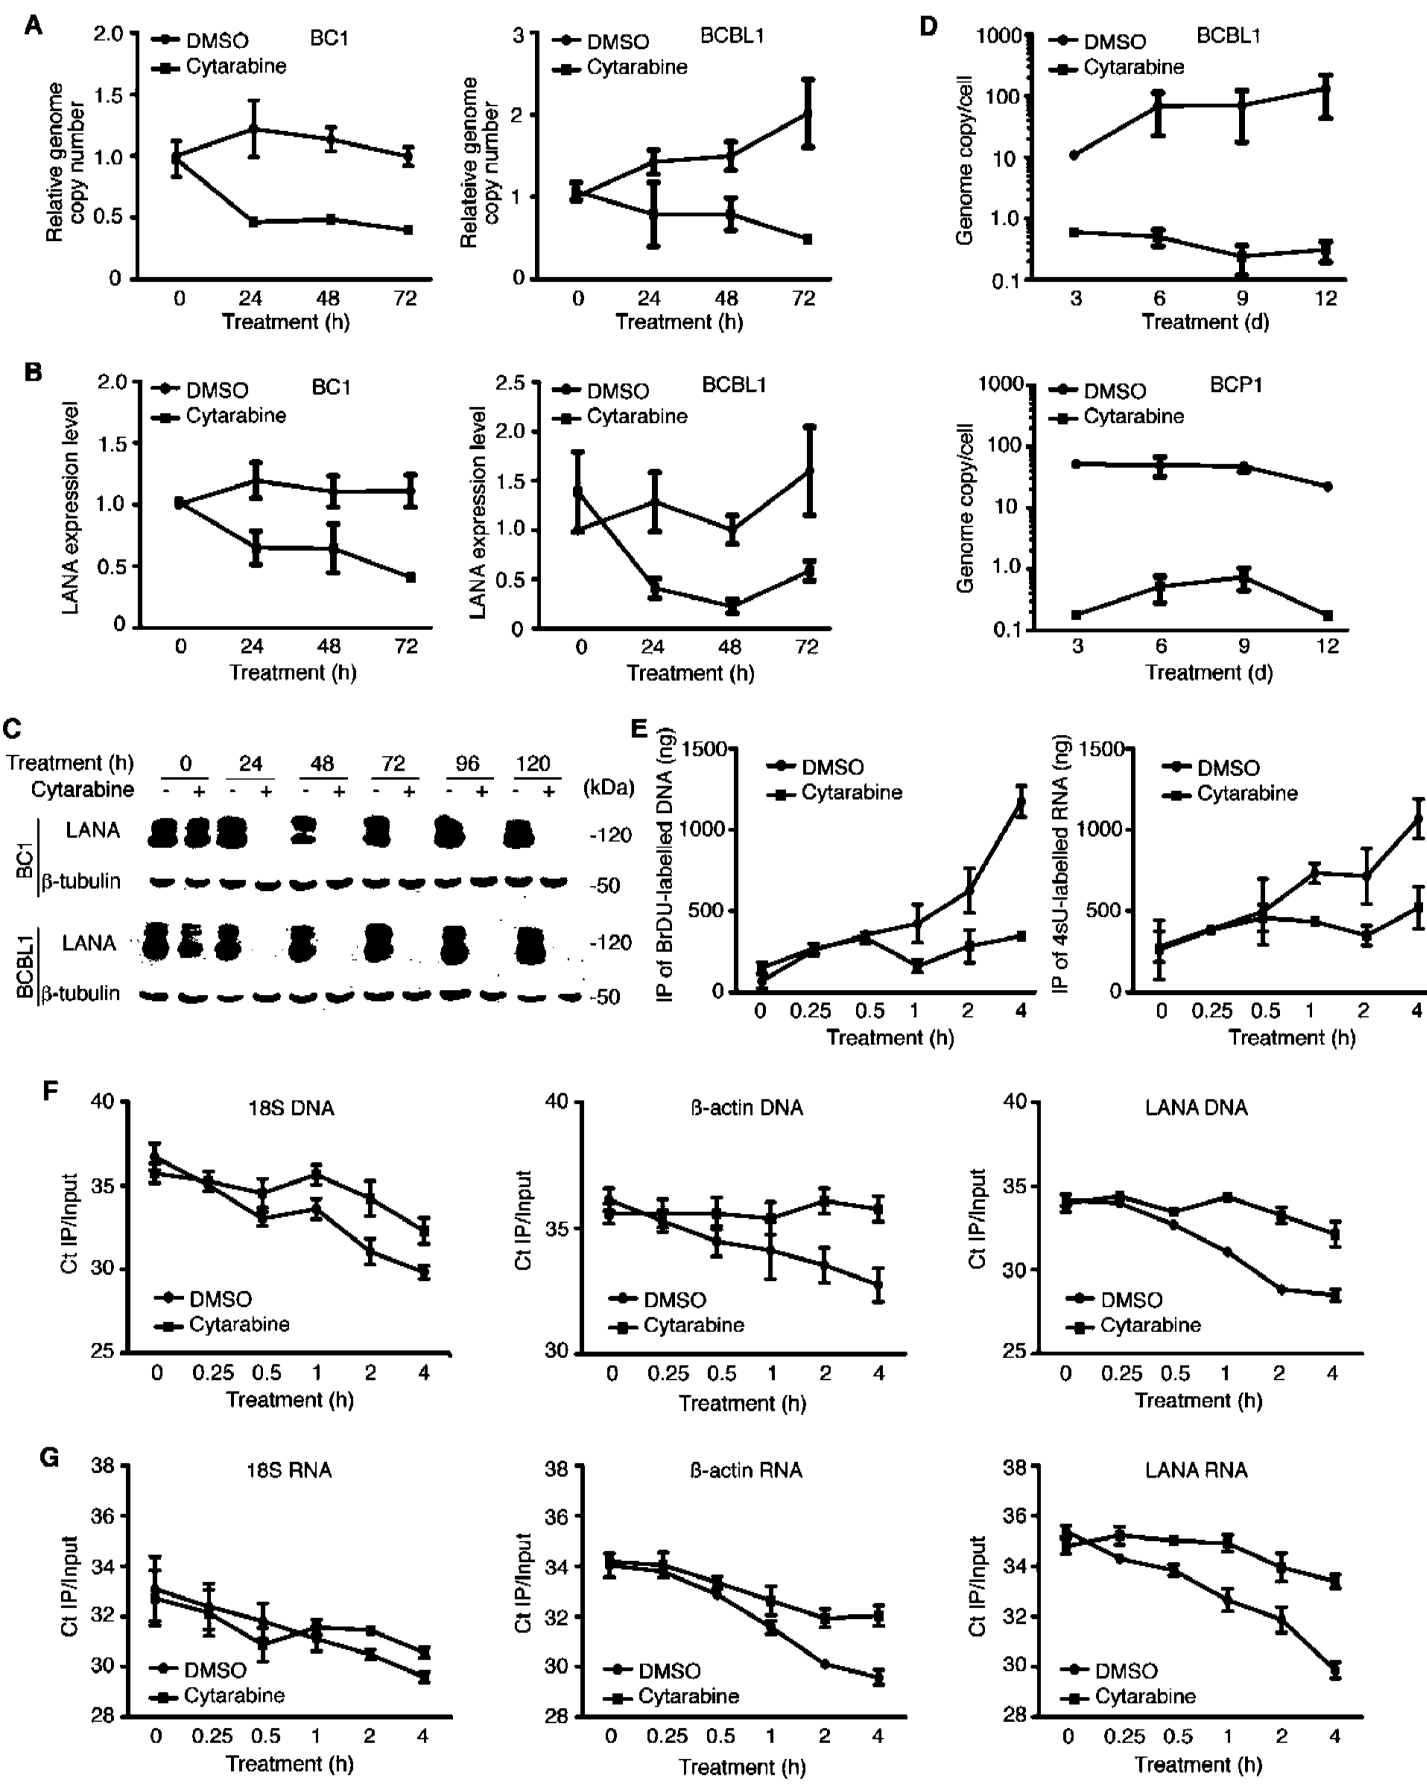

**Figure 6**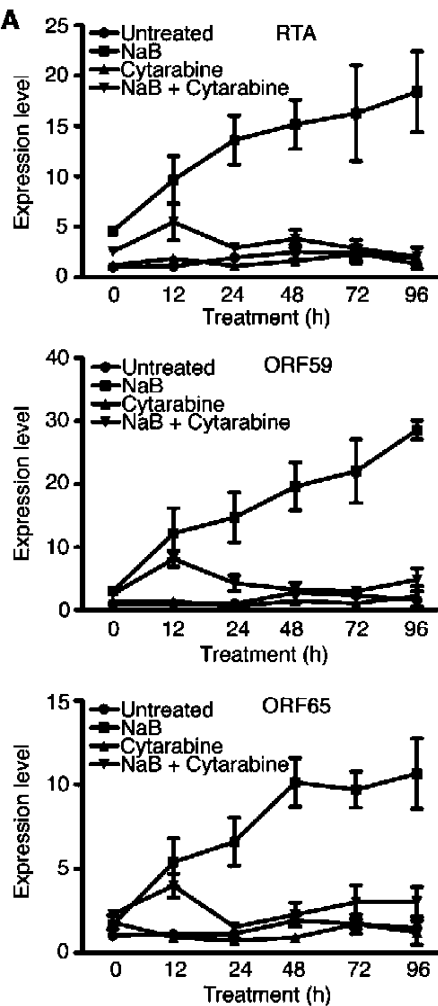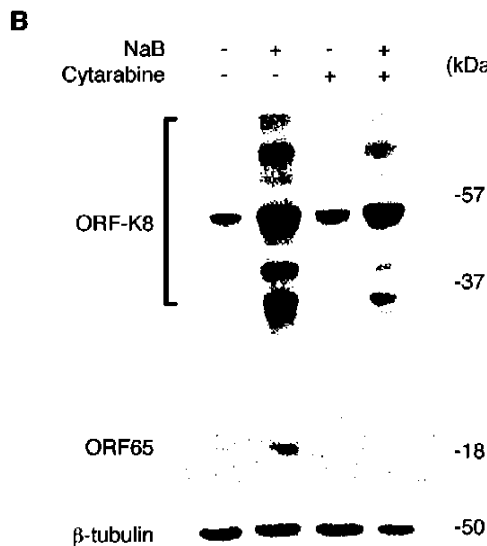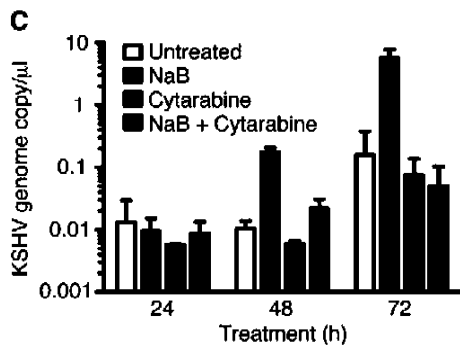

Source: https://www.biorxiv.org/content/10.1101/299339v1.full.pdf
